# Supplementary material for: Predicting Network Activity from High Throughput Metabolomics
Source: PubMed Central journal article supplement (PMC3701697; doi:10.1371/journal.pcbi.1003123), 2013-07-04
Supplement: pcbi.1003123.s011.pdf [file pcbi.1003123.s011.pdf]

| <b>pathway</b>                                            | <b>overlap_ size</b> | <b>pathway_ size</b> | <b>enrichment p-value</b> | <b>adjusted p-value</b> |
|-----------------------------------------------------------|----------------------|----------------------|---------------------------|-------------------------|
| Purine metabolism                                         | 21                   | 53                   | 0.0026                    | 0.0020                  |
| Aspartate and asparagine metabolism                       | 24                   | 67                   | 0.0063                    | 0.0021                  |
| Aminosugars metabolism                                    | 14                   | 33                   | 0.0068                    | 0.0022                  |
| Sialic acid metabolism                                    | 12                   | 29                   | 0.0150                    | 0.0024                  |
| Vitamin B9 (folate) metabolism                            | 8                    | 17                   | 0.0197                    | 0.0028                  |
| Hexose phosphorylation                                    | 8                    | 18                   | 0.0287                    | 0.0031                  |
| Drug metabolism - cytochrome P450                         | 13                   | 37                   | 0.0475                    | 0.0034                  |
| Vitamin B1 (thiamin) metabolism                           | 5                    | 10                   | 0.0488                    | 0.0050                  |
| Vitamin B3 (nicotinate and nicotinamide) metabolism       | 8                    | 21                   | 0.0719                    | 0.0050                  |
| Histidine metabolism                                      | 8                    | 21                   | 0.0719                    | 0.0050                  |
| Tryptophan metabolism                                     | 20                   | 69                   | 0.1083                    | 0.0052                  |
| N-Glycan biosynthesis                                     | 6                    | 14                   | 0.0675                    | 0.0055                  |
| Glutathione Metabolism                                    | 5                    | 11                   | 0.0737                    | 0.0067                  |
| Methionine and cysteine metabolism                        | 15                   | 51                   | 0.1377                    | 0.0070                  |
| Tyrosine metabolism                                       | 23                   | 86                   | 0.1784                    | 0.0084                  |
| Glycerophospholipid metabolism                            | 13                   | 44                   | 0.1559                    | 0.0085                  |
| Ubiquinone Biosynthesis                                   | 4                    | 8                    | 0.0779                    | 0.0085                  |
| Glycosphingolipid biosynthesis - globoseries              | 4                    | 8                    | 0.0779                    | 0.0085                  |
| Glutamate metabolism                                      | 5                    | 12                   | 0.1042                    | 0.0091                  |
| Putative anti-inflammatory metabolites formation from EPA | 7                    | 20                   | 0.1330                    | 0.0094                  |
| Pyrimidine metabolism                                     | 13                   | 45                   | 0.1776                    | 0.0100                  |
