# Supplementary material for: Predicting Network Activity from High Throughput Metabolomics
Source: PubMed Central journal article supplement (PMC3701697; doi:10.1371/journal.pcbi.1003123), 2013-07-04
Supplement: pcbi.1003123.s012.pdf [file pcbi.1003123.s012.pdf]

| Gene | Primer sequences (forward, reverse)                         | references                                                |
|------|-------------------------------------------------------------|-----------------------------------------------------------|
| B2M  | AAGATTCAGGTTTACTCACGTC<br>TGATGCTGCTTACATGTCTCG             | Scheres et al. (2010) J Periodontal Res.<br>45(2):262-70. |
| IL-6 | GGCACTGGCAGAAAACAACC<br>GGCAAGTCTCCTCATTGAATCC              | Scheres et al. (2010) J Periodontal Res.<br>45(2):262-70. |
| iNOS | GCG ACA GAG ACA GGA AAA TC<br>GTA CTT ATC CAT GCA GAC AAC C | Yao et al. (2010) Nitric Oxide.<br>22(3):197-204.         |
| nNOS | GGC AGA GAT GAA AGA TAT GGG<br>GAA TAT GGG TTG TTG AGG ACG  | Yao et al. (2010) Nitric Oxide.<br>22(3):197-204.         |
| eNOS | CCA GGA AAC GGT CGC TT<br>CAA ACC ACT CCA GCG T             | Yao et al. (2010) Nitric Oxide.<br>22(3):197-204.         |
| GCLC | GATGCTGTCTTGCAGGGAATG<br>AGCGAGCTCCGTGCTGTT                 | Coppin et al. (2008) JBC<br>283:19342–19350               |
| GCLM | GAAGCAAGTTTCCAAGAAGCTCTT<br>CTCTACTTTTCAACAATGACCGAATACC    | Coppin et al. (2008) JBC<br>283:19342–19350               |
| GSS  | CCTGCTAGTGGATGCTGTCA<br>GGACTTGCTTGTGGATGTCA                | Coppin et al. (2008) JBC<br>283:19342–19350               |
